# Supplementary material
Source: Springer Nature journal article supplement (https://www.springermedizin.de/resource/supplementary/12881_2013_1205_MOESM3_ESM.pdf/9452144)

**Figure S1: Microsatellite analysis revealing loss of the paternal allele in patient A and TS.**

Homozygosity or hemizyosity at microsatellite loci was analyzed by PCR and amplification products analyzed with the ABI Prism Peak Scanner Software.

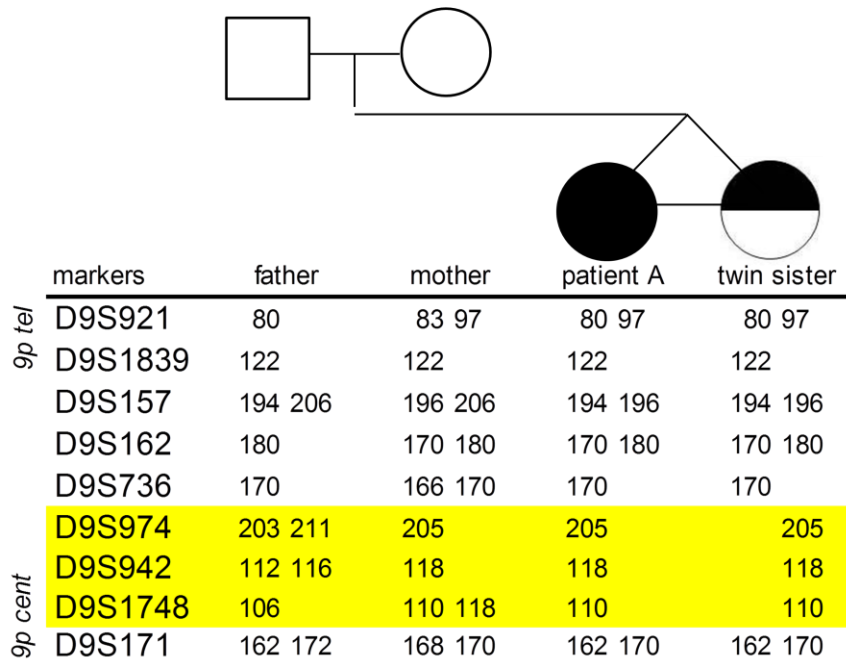

Supplement: MOESM3 [file 9452144]
